# Supplementary material
Source: ML conference proceedings conference paper supplement (https://openaccess.thecvf.com/content/ICCV2025/html/Tan_Towards_Privacy-preserved_Pre-training_ICCV_2025_paper.html)
Supplement: Supplementary file 1 [file Tan_Towards_Privacy-preserved_Pre-training_ICCV_2025_supplemental.pdf]

# Towards Privacy-preserved Pre-training of Remote Sensing Foundation Models with Federated Mutual-guidance Learning

## Supplementary Material

### A. Overview

We provide the following materials to supplement our paper and divide them into two sections.

- We provide the theoretical analysis of our proposed FedSense in Sec. B.
- We provide the details of our pre-training datasets and downstream datasets in Sec. C

### B. Theoretical Analysis

#### B.1. Assumptions

**Assumption 1 (Smoothness)** The self-supervised loss  $\mathcal{L}_m^{ssl}$  is  $L$ -smooth:

$$\|\nabla \mathcal{L}_m^{ssl}(\theta_1) - \nabla \mathcal{L}_m^{ssl}(\theta_2)\| \leq L\|\theta_1 - \theta_2\|, \quad \forall \theta_1, \theta_2 \quad (19)$$

**Assumption 2 (Bounded Gradient)** Local gradients are bounded:

$$\mathbb{E}[\|\nabla \mathcal{L}_m^{total}(\theta_m)\|^2] \leq G^2, \quad \forall m \quad (20)$$

**Assumption 3 (Parameter Discrepancy)** The discrepancy between local and global models satisfies:

$$\|\theta_m - \Theta\| \leq \delta, \quad \forall m \in [M] \quad (21)$$

where  $\delta$  quantifies the maximum client drift.

#### B.2. Key Lemmas

**Lemma 1 (Optimal Perturbation Bound)** Under Assumption 2, the optimal perturbation  $\tilde{\epsilon}$  in SCG satisfies:

$$\|\tilde{\epsilon}\| \leq \lambda \sqrt{\beta^2 \delta^2 + G^2} \quad (22)$$

**Proof 1** From the perturbation approximation:

$$\begin{aligned} \tilde{\epsilon} &\approx \lambda \frac{\nabla \mathcal{L}_m^{disc}}{\|\nabla \mathcal{L}_m^{disc}\|} \\ \|\tilde{\epsilon}\| &\leq \lambda \sqrt{\frac{\|\nabla \mathcal{L}_m^{disc}\|^2}{\|\nabla \mathcal{L}_m^{disc}\|^2}} = \lambda \end{aligned}$$

Using the parameter discrepancy term  $\nabla \mathcal{L}_m^{disc} = \beta(\theta_m - \Theta)$  and Assumption 3:

$$\|\nabla \mathcal{L}_m^{disc}\| \leq \beta \delta$$

Combining with the gradient bound  $G$  via the triangle inequality completes the proof.

**Lemma 2 (Quantization Error Decay)** Let  $e_m^t$  be the feedback error in CSG. With momentum factor  $\alpha \in (0, 1)$ , the error decays geometrically:

$$\|e_m^t\| \leq \alpha^t \|e_m^0\| + \frac{1-\alpha}{1-\alpha^{t+1}} \sum_{k=0}^t \alpha^{t-k} \|\epsilon_q^k\| \quad (23)$$

where  $\epsilon_q^k$  is the quantization error at round  $k$ .

**Proof 2** Unrolling the recursive error update:

$$\begin{aligned} e_m^t &= \alpha e_m^{t-1} + (1-\alpha) \epsilon_q^t \\ &= \alpha^t e_m^0 + (1-\alpha) \sum_{k=1}^t \alpha^{t-k} \epsilon_q^k \end{aligned}$$

Taking norms and applying the triangle inequality:

$$\begin{aligned} \|e_m^t\| &\leq \alpha^t \|e_m^0\| + (1-\alpha) \sum_{k=1}^t \alpha^{t-k} \|\epsilon_q^k\| \\ &\leq \alpha^t \|e_m^0\| + \frac{1-\alpha}{1-\alpha^{t+1}} \sum_{k=0}^t \alpha^{t-k} \|\epsilon_q^k\| \end{aligned}$$

The geometric series bound completes the proof.

#### B.3. Main Convergence Result

**Theorem 1 (Convergence Guarantee)** Under Assumptions 1-3, let learning rate  $\gamma = \frac{1}{L\sqrt{T}}$ . After  $T$  rounds, the averaged gradient satisfies:

$$\frac{1}{T} \sum_{t=1}^T \mathbb{E} \|\nabla \mathcal{L}^{total}(\Theta^t)\|^2 \leq \frac{2L(\mathcal{L}^0 - \mathcal{L}^*)}{\sqrt{T}} + \frac{C}{T} \sum_{t=1}^T (\delta^2 + \|e^t\|^2) \quad (24)$$

where  $C$  is a constant combining  $L, G, \beta, \lambda$ .

**Proof 3 (Proof Sketch)** Using smoothness (Assump. 1):

$$\mathcal{L}^{t+1} \leq \mathcal{L}^t + \langle \nabla \mathcal{L}^t, \Theta^{t+1} - \Theta^t \rangle + \frac{L}{2} \|\Theta^{t+1} - \Theta^t\|^2$$

Substituting the update rule  $\Theta^{t+1} = \Theta^t - \gamma(\nabla \mathcal{L}^{total} + e^t)$ :

$$\begin{aligned} \mathbb{E}[\mathcal{L}^{t+1}] &\leq \mathbb{E}[\mathcal{L}^t] - \gamma \mathbb{E} \|\nabla \mathcal{L}^t\|^2 + \gamma \mathbb{E} \langle \nabla \mathcal{L}^t, e^t \rangle \\ &\quad + \frac{L\gamma^2}{2} \mathbb{E} \|\nabla \mathcal{L}^t + e^t\|^2 \end{aligned}$$

**Hyperparameters analysis.** We provide more analysis on some hyperparameters  $\lambda, \rho$ , and  $\alpha$  in Fig. 4. They are insensitive to the performance of FedSense with our self-stabilized design.

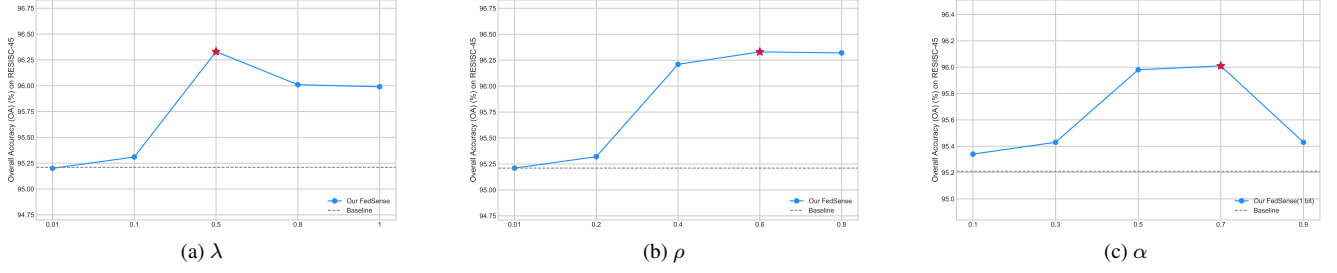

Figure 4. Hyperparameters analysis on  $\lambda$ ,  $\rho$ , and  $\alpha$ .

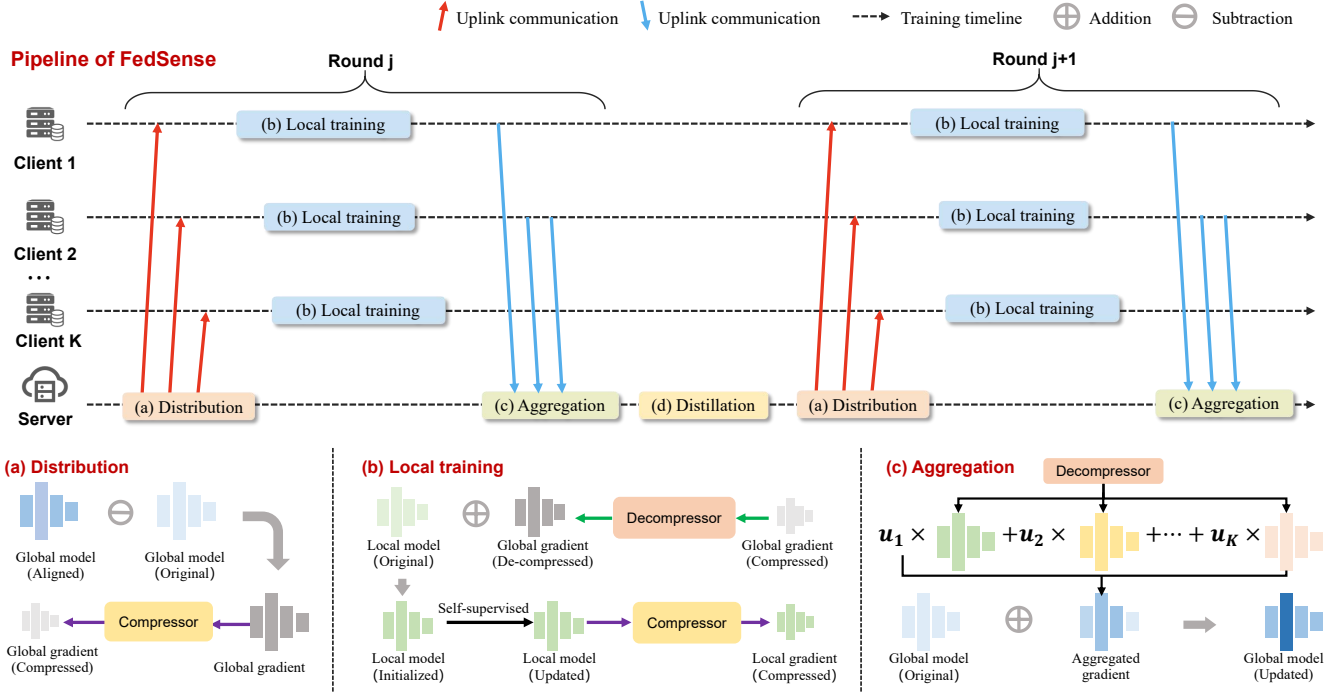

Figure 5. Pipeline of privacy-preserved pre-training of RSFMs.

## C. Dataset details and implementation details

### Scene Classification.

- (1) *Aerial Image Dataset (AID)* [55]. This dataset is comprised of 10,000 images across 30 classes, all sourced from Google Earth and cropped to  $600 \times 600$  pixels. It also includes diverse resolutions from 0.5 to 8 meters per pixel and geographic variations to enhance robustness.
- (2) *NWPU-RESISC45* [8]. This dataset comprises 31,500 RGB images at resolutions from 0.2m to 30m across 45 scene classes, each with 700 samples with a size of 256 times 256 pixels. It offers significant variability in translation, scale, viewpoint, illumination, and occlusion. It also has high within-class diversity and inter-class similarity.

### Object Detection.

- (1) *DIOR-R* [9]. This dataset consists of 23,463 remote sensing images, with 192,472 annotated object instances spanning 20 categories. The size of each image is  $800 \times 800$  pixels, and spatial resolutions range from 0.5m to 30m. With emphasis on high inter-class similarity, intra-class diversity, and object size variability, it is designed to benchmark object detection methods in diverse conditions such as different imaging times, weathers, and resolutions.
- (2) *DOTA-v1.0* [56]. This dataset consists of 2,806 aerial images, measuring from  $800 \times 800$  to  $4000 \times 4000$  pixels, annotated with 188,282 instances across 15 categories that include airplanes, ships, vehicles, and bridges. The objects in this dataset are presented in diverse scales, orientations and aspect ratios.

### Semantic Segmentation.

- (1) *LoveDA* [52]. This dataset for domain-adaptive seman-

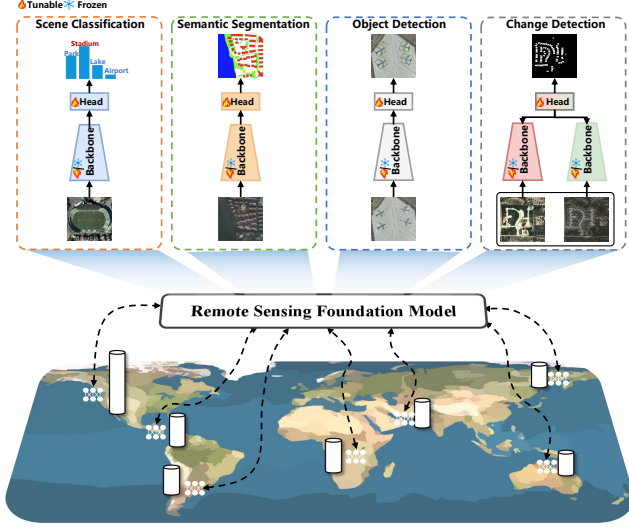

Figure 6. **Illustration on downstream usage of collaboratively pre-trained RSFMs to accommodate various Earth Observation tasks.**

tic segmentation features 5,987 images with a spatial resolution of 0.3 m, each sized at  $1024 \times 1024$  pixels in RGB format. Covering  $536.15 \text{ km}^2$ , it spans urban and rural areas across Nanjing, Changzhou and Wuhan, and includes pixel-level annotations across seven land-cover categories. It addresses challenges of multi-scale objects, complex backgrounds, and inconsistent class distributions, supporting semantic segmentation and unsupervised domain adaptation.

- (2) *Inria* [38]. This dataset comprises high-resolution RGB aerial imagery, with 180 training and 180 test tiles (each  $1500 \times 1500$  pixels, 0.3 m resolution). It focuses on two classes: building and non-building, covering a total of  $405 \text{ km}^2$  of urban areas across five cities in the U.S. and Austria. The dataset emphasizes generalization challenges, supporting semantic segmentation across diverse urban landscapes.

#### Change Detection.

- (1) *LEVIR-CD+* [6]. This dataset is a high-resolution urban building change detection dataset comprised of 985 RGB image pairs from Google Earth, each measuring  $1024 \times 1024$  pixels with a spatial resolution of 0.5 meters per pixel. Spanning 20 regions in Texas, the dataset includes building and land use change masks, covering the years 2002 to 2020 with a 5-year observation interval. It features predominantly urban areas and near-nadir imagery, making it accessible for change detection studies.
- (2) *SECOND* [62]. This dataset is a large-scale semantic change detection benchmark, comprising 4,662 image pairs, each with a size of  $512 \times 512$  pixels. The images

were collected from multiple platforms across multiple cities including Hangzhou, Chengdu, and Shanghai. It focuses on six land-cover classes: non-vegetated ground surface, tree, low vegetation, water, buildings, and playgrounds. *SECOND* also offers approximately 30 change types, including changes within the same land-cover class, with pixel-level annotations ensuring high diversity and label accuracy.

| ID        | Source        | #samples  | GSD (m)  | Coverage |
|-----------|---------------|-----------|----------|----------|
| Server    | WorldView-3/4 | 240,000   | 0.5-2.5  | Global   |
| Client 01 | NOAA          | 22,292    | 0.25     | USA      |
| Client 02 | GF-2          | 27,300    | 4.0      | China    |
| Client 03 | WorldView-2   | 88,272    | 0.3-0.5  | Global   |
| Client 04 | Mixed         | 125,474   | 0.3-25   | Global   |
| Client 05 | QB-2/GE-1     | 180,562   | 0.3      | Global   |
| Client 06 | JL-1/GF-7     | 40,816    | 0.8      | China    |
| Client 07 | Mixed         | 90,000    | 0.3-25   | Global   |
| Client 08 | QB-2/GE-1     | 180,000   | 0.3-25   | Global   |
| Client 09 | NAIP          | 45,000    | 1.25     | USA      |
| Client 10 | Mixed         | 50,800    | 0.3-0.75 | Global   |
| Total     | Multi-source  | 1,000,000 | 0.25-25  | Global   |

Table 7. **Details of the pre-training datasets.**
